# Supplementary material for: Comprehensive PBPK Model of Rifampicin for Quantitative Prediction of Complex Drug‐Drug Interactions: CYP3A/2C9 Induction and OATP Inhibition Effects
Source: PubMed Central journal article supplement — CPT Pharmacometrics Syst Pharmacol. 2018 Feb 5;7(3):186–96. doi: 10.1002/psp4.12275 (PMC5869557; doi:10.1002/psp4.12275), 2018-02-05
Supplement: PSP4-7-186-s004.pdf [file PSP4-7-186-s004.pdf]

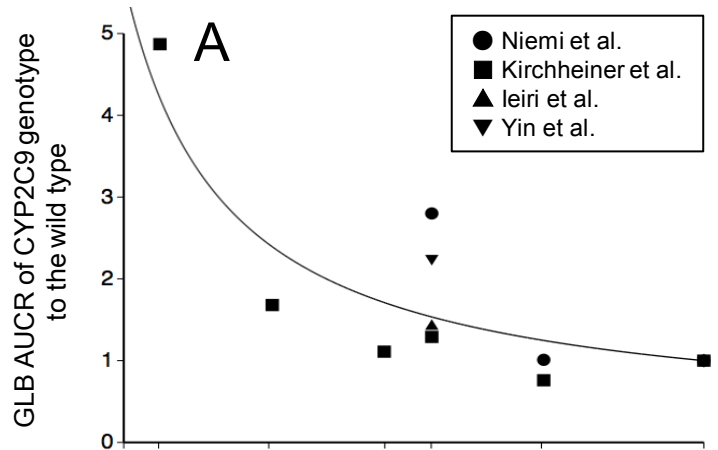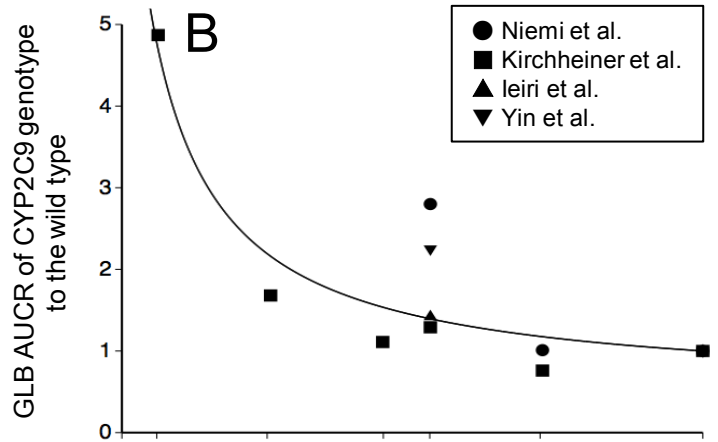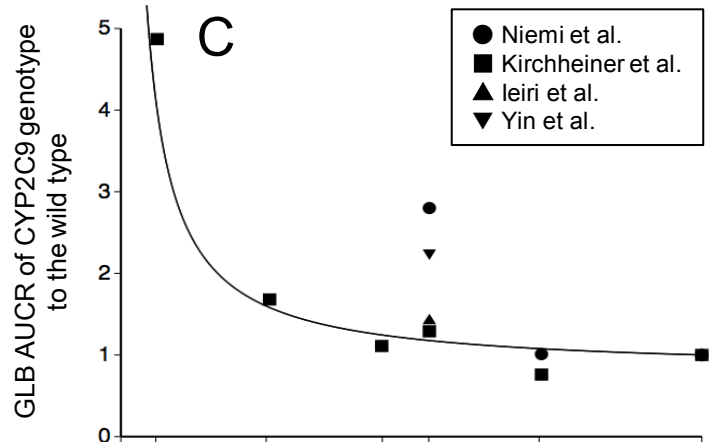

CL<sub>int</sub> ratio of CYP2C9 genotype to the wild type

(<sup>\*</sup>3/<sup>\*</sup>3) 0.0624    (<sup>\*</sup>2/<sup>\*</sup>3) 0.256    (<sup>\*</sup>2/<sup>\*</sup>2) 0.449    (<sup>\*</sup>1/<sup>\*</sup>3) 0.531    (<sup>\*</sup>1/<sup>\*</sup>2) 0.724    (<sup>\*</sup>1/<sup>\*</sup>1) 1
