# Supplementary figures and images for: Comprehensive PBPK Model of Rifampicin for Quantitative Prediction of Complex Drug‐Drug Interactions: CYP3A/2C9 Induction and OATP Inhibition Effects
Source: PubMed Central journal article supplement — CPT Pharmacometrics Syst Pharmacol. 2018 Feb 5;7(3):186–96. doi: 10.1002/psp4.12275 (PMC5869557; doi:10.1002/psp4.12275), 2018-02-05

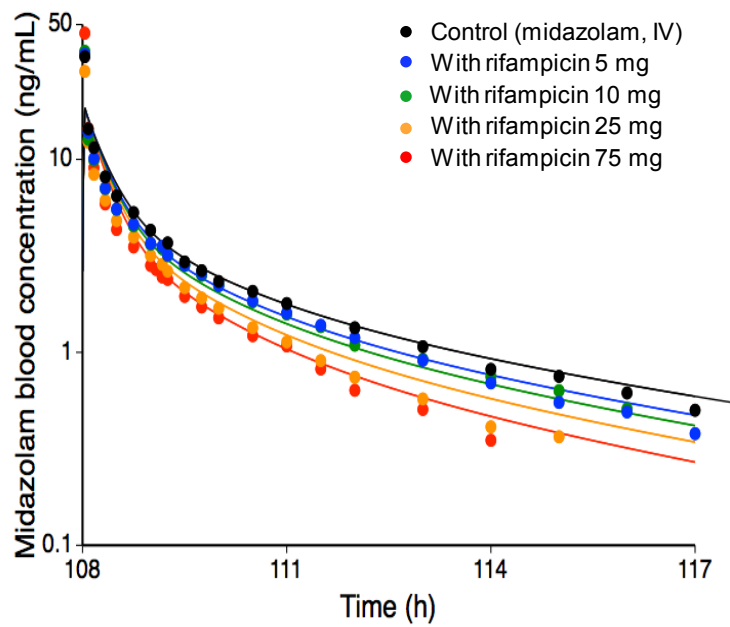

Supplement: PSP4-7-186-s002.pdf [file PSP4-7-186-s002.pdf]

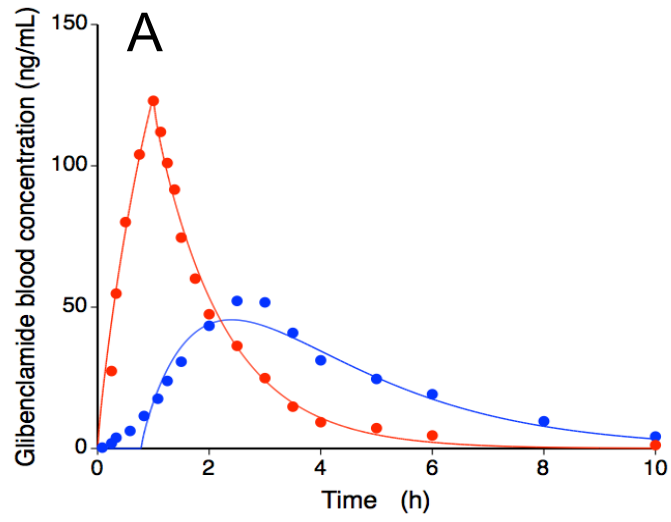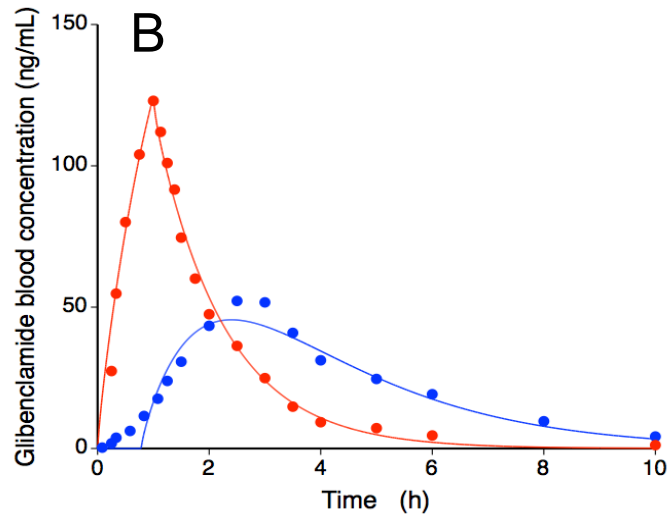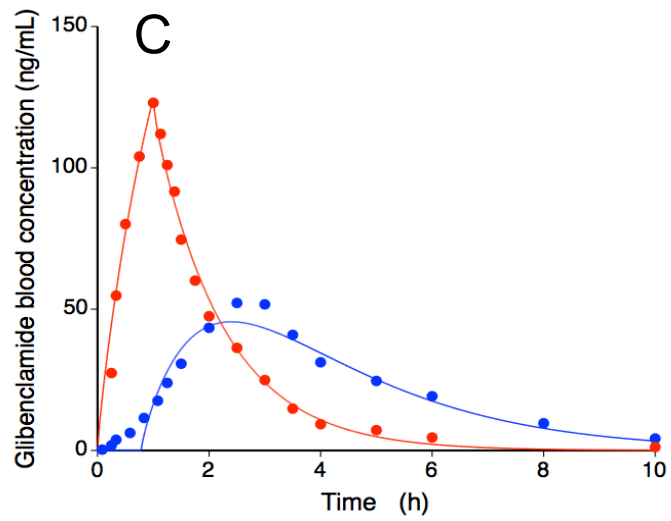

Supplement: PSP4-7-186-s003.pdf [file PSP4-7-186-s003.pdf]

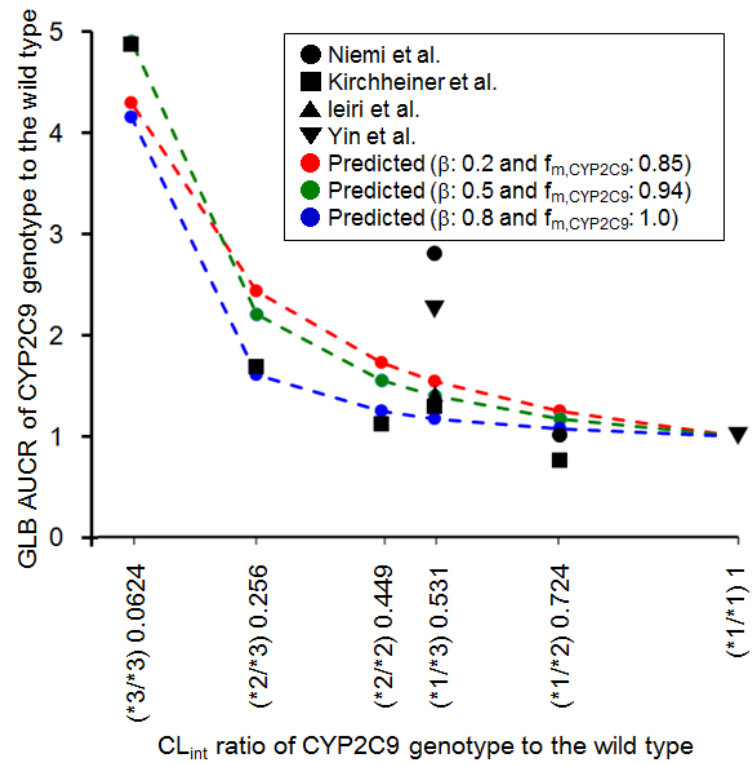

Supplement: PSP4-7-186-s005.pdf [file PSP4-7-186-s005.pdf]
